# Supplementary material for: Single-cell multiomics reveals the complexity of TGFβ signalling to chromatin in iPSC-derived kidney organoids
Source: PubMed Central journal article supplement (PMC9701233; doi:10.1038/s42003-022-04264-1), 2022-11-27
Supplement: 42003_2022_4264_MOESM1_ESM.pdf [file 42003_2022_4264_MOESM1_ESM.pdf]

a

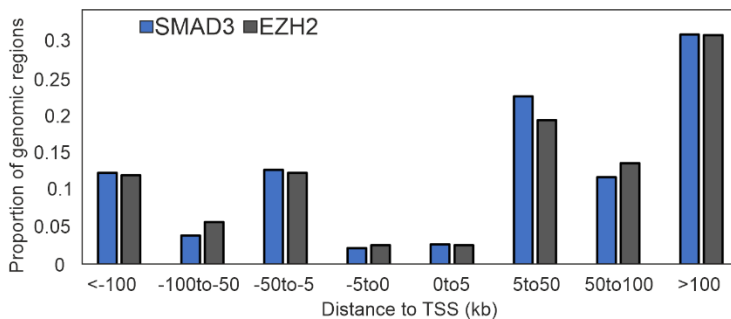

b

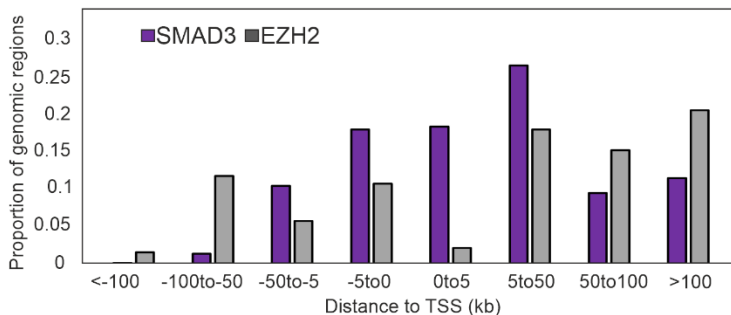

c

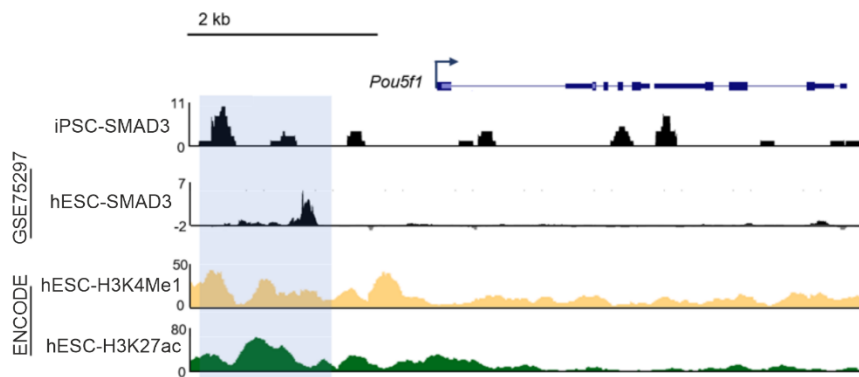

d

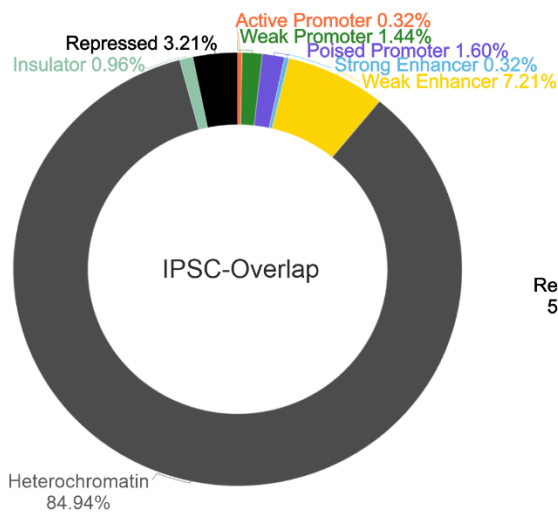

e

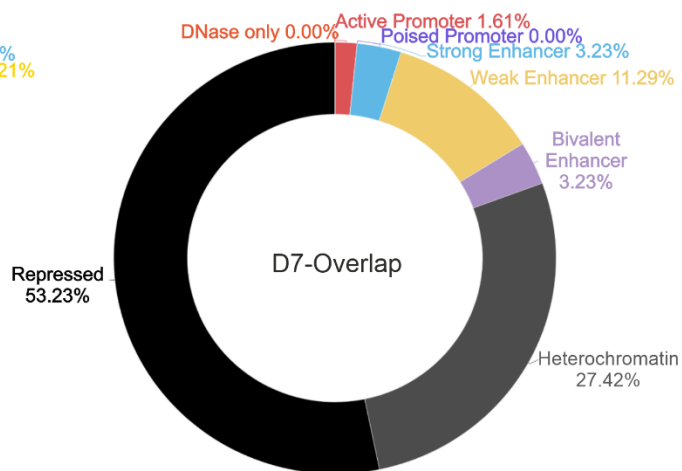

**Supplementary Figure 1: SMAD3 and EZH2 occupied sites in iPSCs and Day 7 intermediate mesoderm cells.**

**a.** Histogram showing the proportion of genomic regions bound by SMAD3 (Blue; n=971) and EZH2 (grey; n=8528) with respect to the distance from a neighbouring TSS at 0-5, 5-50, and 50-100 kilobase (kb) intervals in iPSCs. **b.** Histogram showing the proportion of genomic regions bound by SMAD3 (Blue; n=971) and EZH2 (grey; n=8528) with respect to the distance from a neighbouring TSS at 0-5, 5-50, and 50-100 kilobase (kb) intervals. **c.** *Pou5f1* (OCT4) locus showing SMAD3 peaks from iPSCs and hESCs (Geo Accession number: GSE75297) as well as H3K4me1 and H3K27ac ChIP-seq peaks from the ENCODE project. Distribution of genomic features that were bound by both SMAD3 and EZH2 in **d.** iPSCs and **e.** nephron progenitors using ChromHMM annotation from Encode.

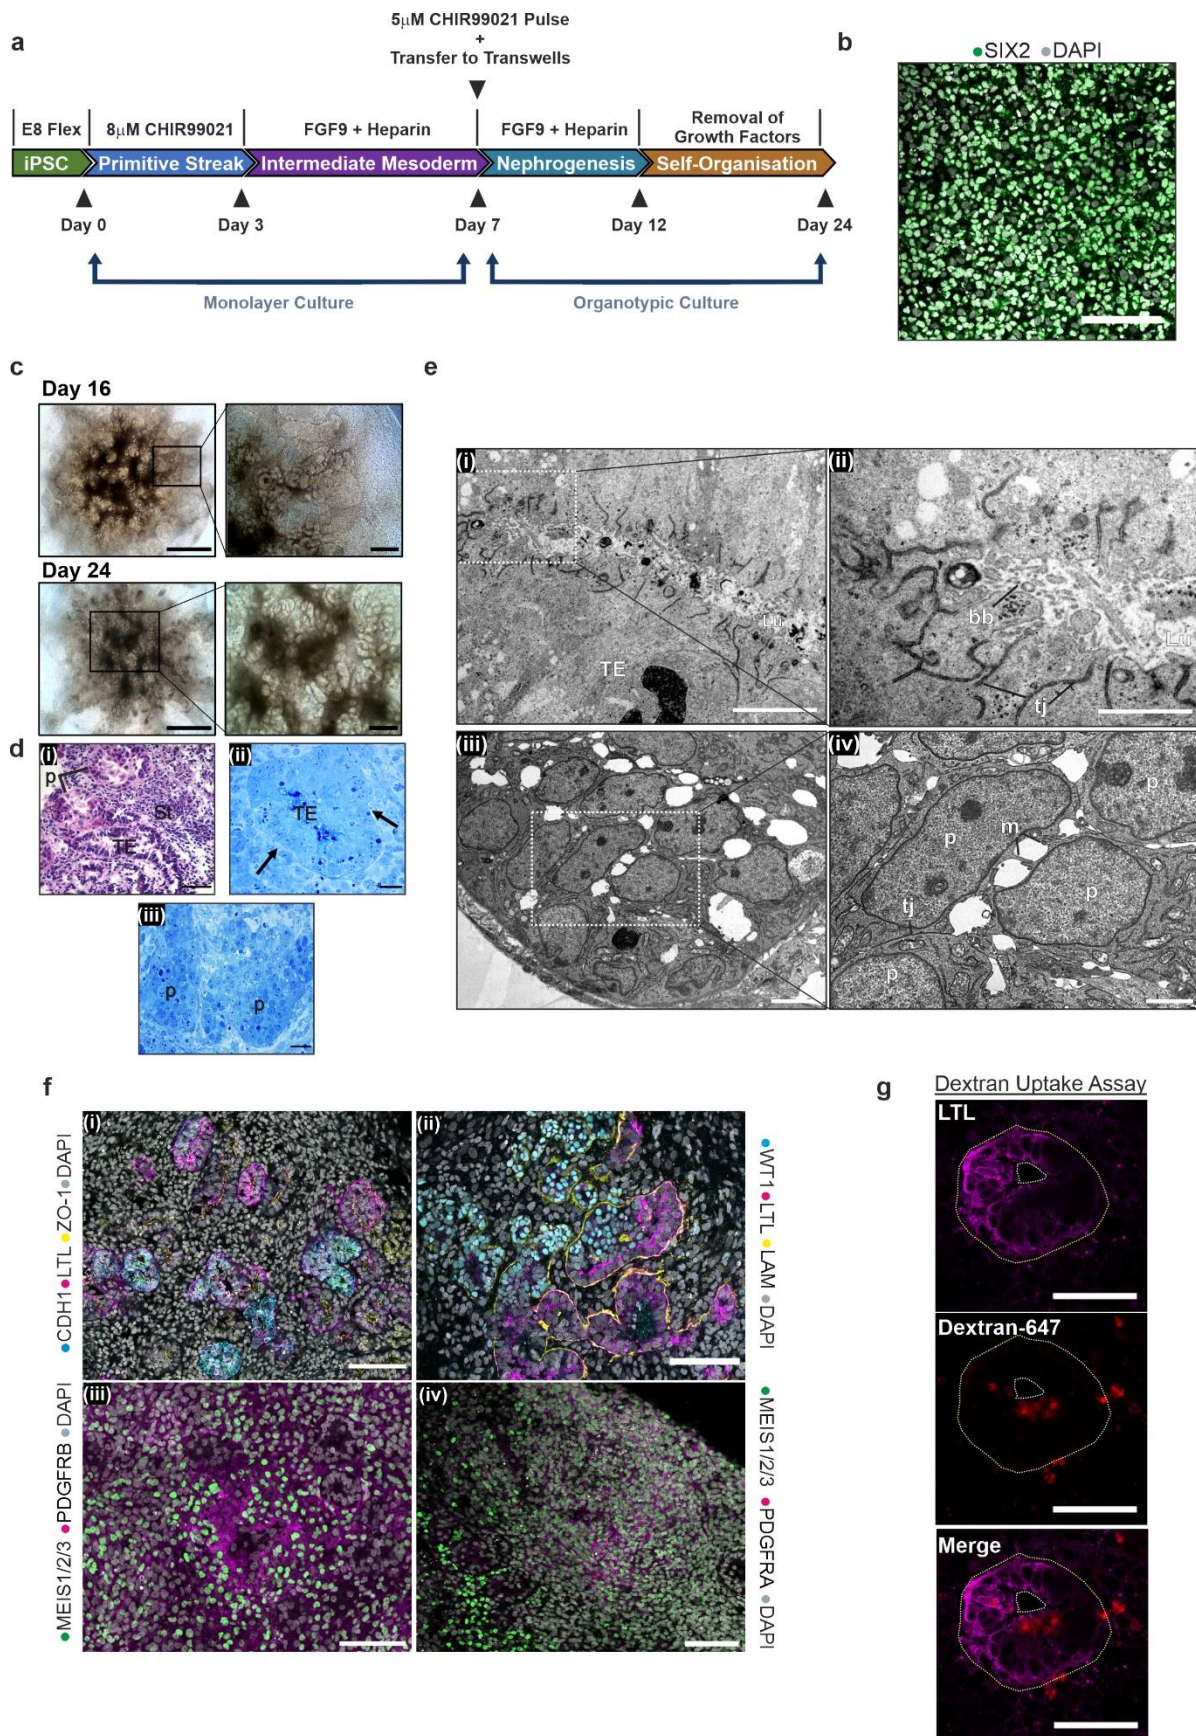

**Supplementary Figure 2: Derivation and characterisation of kidney organoids**

**a.** Kidney organoids were generated from human iPSCs using an adaptation of the protocol as described by Takasato et al. (2016). **b.** Cells were positive for SIX2 by immunofluorescence on Day 7 of differentiation. Scale: 100µm. **c.** Networks of tubular epithelial structures were apparent by day 16 and matured up to day 24. Magnification: 4X and 20X. Scale bar: 1mm and 250µm. **d. (i)** Haematoxylin and Eosin staining of kidney organoids showing developing podocyte-like structures (p) and tubular epithelial structures (TE) surrounded by interstitium (St). Toluidine blue staining of organoids showing the presence of **(ii)** tubular epithelia (black arrows) and developing podocyte-like structures. Magnification: **(i)** 20X. **(ii)** 60X. **(iii)** 40X. Scale bar: 50µm. **e.** Organoids contained appropriate **(i)** tubular epithelial structure with presence of brush-border (bb), tight junctions (tj) and lumen (Lu) and developing podocytes (p) containing tight junctions and microvilli (m). Magnification: **(i)** 4200X, **(ii)** 11500X, **(iii)** 2550X, **(iv)** 6000X. Scale bar: **(i)** 5µm, **(ii)** 1µm, **(iii)** 5µm, **(iv)** 2µm. **f.** Organoids demonstrated **(i)** a spatially organised segmented structure consisting of proximal (LTL/ZO-1<sup>+ve</sup>) and distal (CDH1/ZO-1<sup>+ve</sup>) tubular epithelial cells, **(ii)** immature podocytes (WT1<sup>+ve</sup>), and **(iii)** interstitial cells (MEIS1/2/3<sup>+ve</sup>, PDGFRA<sup>+ve</sup>, PDGFRB<sup>+ve</sup>). Basement membranes were positive for laminin (Lam) **(ii)**. Scale bar: **(i)** 200µm, **(ii-iv)** 100µm. **g.** Organoids showed functionality by the uptake of fluorescently labelled 10 kDa dextran. Scale bar: 50µm. Images are representative of a minimum of three independent experiments.

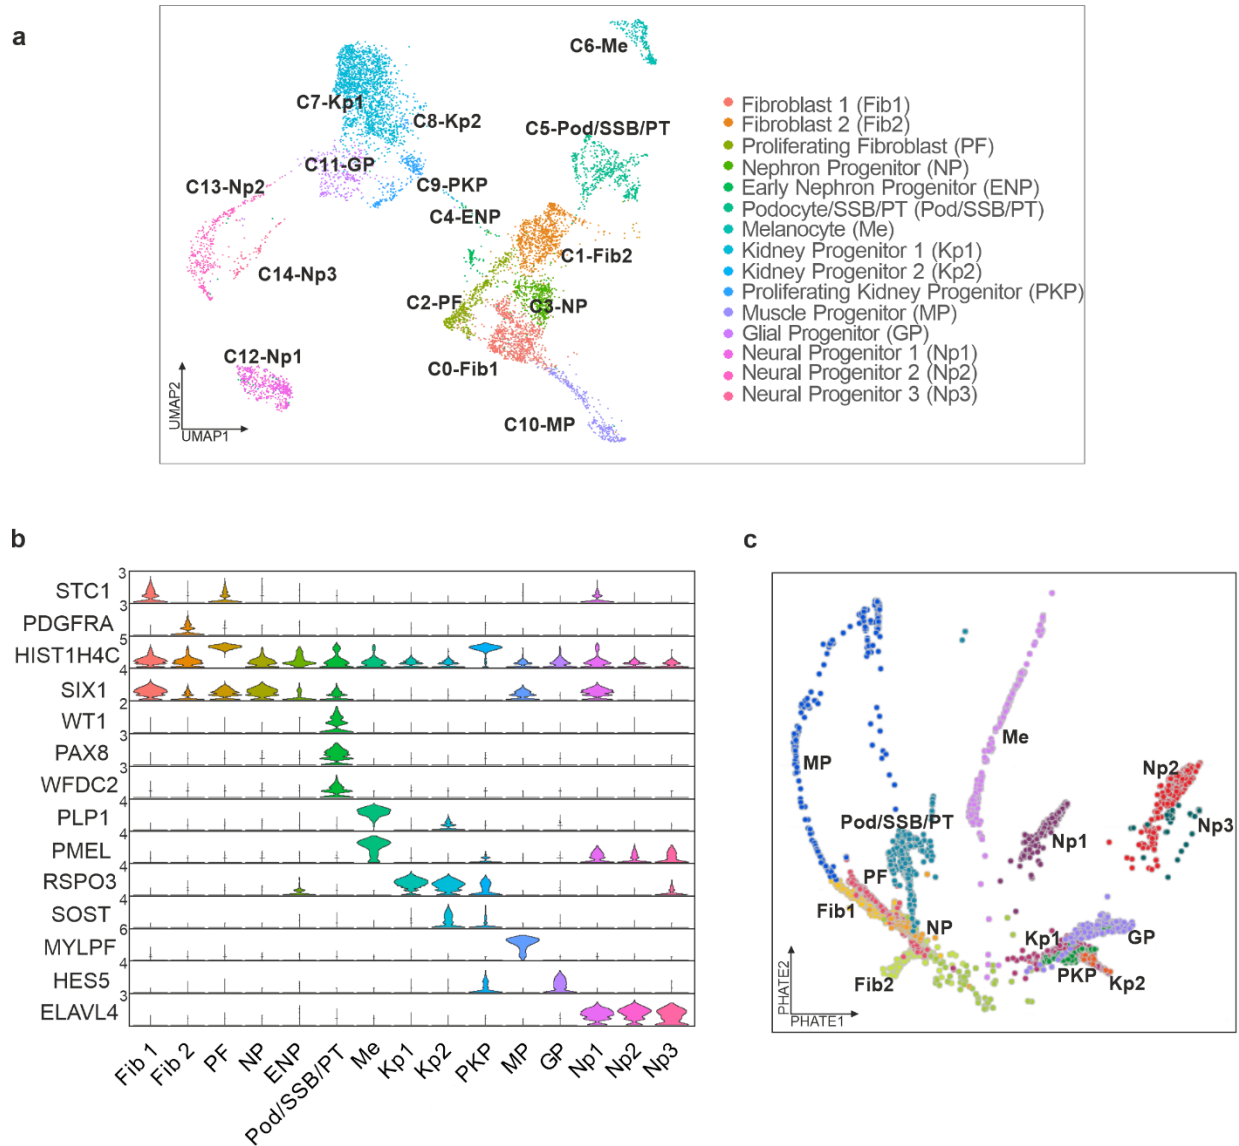

### Supplementary Figure 3. Single cell RNA-seq characterisation of iPSC-derived kidney organoids

**a.** UMAP projection of 4,119 single cells revealing 15 distinct cluster in iPSC-derived kidney organoids, including distinct populations of fibroblasts, interstitial cells, and podocytes. SSB: S-Shaped Body; PT: Proximal Tubule. **b.** Marker genes used to annotate individual cell clusters. **c.** Cell Phate Map illustrating fate trajectories of each cell type within the organoid.

**Supplementary Data 2: Gene ontology analysis (Panther) of top 15 differentially expressed genes per cluster iPSC-derived kidney organoids. SSB = S-shaped body, PT= proximal tubule.**

| Cluster                                              | GO summary for 15 differentially expressed genes                                                                                                                                                                                                                                                                             |
|------------------------------------------------------|------------------------------------------------------------------------------------------------------------------------------------------------------------------------------------------------------------------------------------------------------------------------------------------------------------------------------|
| <b>Cluster 0</b><br><b>Fib 1</b>                     | <i>Striated muscle tissue development (GO:0014706), Actin-myosin filament sliding (GO:0033275), Muscle filament sliding (GO:0030049), Muscle organ development (GO:0007517), epithelial cell differentiation (GO:0007517)</i>                                                                                                |
| <b>Cluster 1</b><br><b>Fib 2</b>                     | <i>Collagen fibril organisation (GO:0030199), Protein complex subunit organisation (GO:0071822), Regulation of epithelial to mesenchymal transition (GO:0010717), Extracellular matrix organisation (GO:0030198), Muscle contraction (GO:0006936)</i>                                                                        |
| <b>Cluster 2</b><br><b>Proliferating fibroblasts</b> | <i>Sister chromatid segregation (GO:0000819), Mitotic nuclear division (GO:0140014), Chromosome condensation (GO:0030261), Mitotic sister chromatin segregation (GO:0007076), Establishment of mitotic spindle localisation (GO:0040001)</i>                                                                                 |
| <b>Cluster 3</b><br><b>Nephron Progenitor</b>        | <i>Regulation of morphogenesis of a branching structure (GO:0001763), Regulation of morphogenesis of an epithelium (GO:0002009), Regulation of animal organ morphogenesis (GO:0009887), Positive regulation of cell proliferation (GO:00082884), histone-serine phosphorylation (GO:0035404)</i>                             |
| <b>Cluster 4</b><br><b>Early Nephron Progenitor</b>  | <i>RNA splicing (GO:0008380), RNA processing (GO:0006396), RNA splicing via transesterification reactions (GO:0000377), mRNA splicing via spliceosome (GO:0000398), mRNA processing (GO0006397)</i>                                                                                                                          |
| <b>Cluster 5</b><br><b>Podocyte/SSB/PT</b>           | <i>Mesenchymal to epithelial transition (GO:0060231), Renal system development (GO:0001822), Branching involved in ureteric bud morphogenesis (GO:0001658), Metanephros development (GO:0001656)</i>                                                                                                                         |
| <b>Cluster 6</b><br><b>Melanocyte</b>                | <i>Autonomic nervous system development (GO:0048483), Positive regulation of cell junction assembly (GO:1901890), Divalent inorganic cation homeostasis (GO:0072507), Metal ion homeostasis (GO:0055065), Receptor metabolic process (GO:0043112)</i>                                                                        |
| <b>Cluster 7</b><br><b>Kidney Progenitor 1</b>       | <i>Regulation of Wnt signalling pathway (GO:0030111), Regulation of planar cell polarity pathway (GO:2000095), Positive regulation of gene expression (GO:0010628), Regulation of transcription from RNA Polymerase II (GO:0006357), Transmembrane receptor protein tyrosine phosphatase signalling pathway (GO:0007185)</i> |

|                                                            |                                                                                                                                                                                                                                                                                                                                        |
|------------------------------------------------------------|----------------------------------------------------------------------------------------------------------------------------------------------------------------------------------------------------------------------------------------------------------------------------------------------------------------------------------------|
| <b>Cluster 8</b><br><b>Kidney Progenitor 2</b>             | <i>Vascular smooth muscle cell differentiation (GO:0035886), negative regulation of glial cell proliferation (GO:0060253), Negative regulation of oligodendrocyte differentiation (GO:0048715), Vascular smooth muscle cell differentiation (GO:0097084), Regulation of intrinsic apoptotic signalling pathway by p53 (GO:1902253)</i> |
| <b>Cluster 9</b><br><b>Proliferating Kidney Progenitor</b> | <i>Chromosome condensation (GO:0030261), Mitotic sister chromatin segregation (GO:0007076), Regulation of cell cycle G2/M phase transition (GO:1902749), Mitotic chromosome condensation (GO:0007076), Regulation of protein localisation to the nucleus (GO:1900180)</i>                                                              |
| <b>Cluster 10</b><br><b>Muscle Progenitor</b>              | <i>Muscle filament sliding (GO:0030049), Actin-myosin filament sliding (GO:0033275), Muscle contraction (GO:0006936), Striated muscle contraction (GO:0006941), Skeletal muscle contraction (GO:0003009)</i>                                                                                                                           |
| <b>Cluster 11</b><br><b>Glial Progenitors</b>              | <i>Negative regulation of neuron differentiation (GO:0045665), Glial cell differentiation (GO:0010001), Negative regulation of neurogenesis (GO:0060768), Regulation of cysteine-type endopeptidase activity (GO:2000116), Eye development (GO:0001654)</i>                                                                            |
| <b>Cluster 12</b><br><b>Neural Progenitor 1</b>            | <i>Regulation of dephosphorylation (GO:0035303), Substantia nigra development (GO:0021762), Nervous system development (GO:0007399), Glomerular epithelial cell differentiation (GO:0072311), Membrane raft assembly (GO:0061318)</i>                                                                                                  |
| <b>Cluster 13</b><br><b>Neural Progenitor 2</b>            | <i>Regulation of microtubule depolymerisation (GO:0031114), Neuron migration (GO:0001764), Generation of neurons (GO:0048699), Positive regulation of axon guidance (GO:1902669), Regulation of protein depolymerisation (GO:0048666)</i>                                                                                              |
| <b>Cluster 14</b><br><b>Neural Progenitor 3</b>            | <i>Microtubule depolymerisation (GO:0007019), Central nervous system development (GO:0007417), Regulation of cytoskeleton organisation (GO:0051493), Neuron development (GO:0007399), Nervous system development (GO:0007399)</i>                                                                                                      |

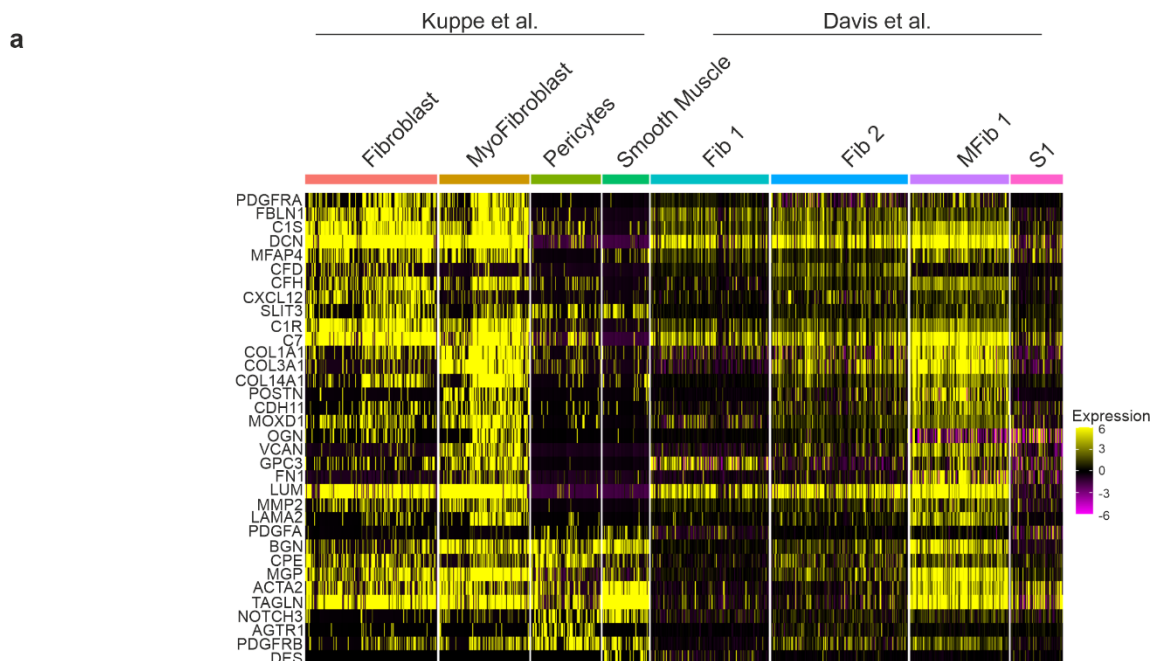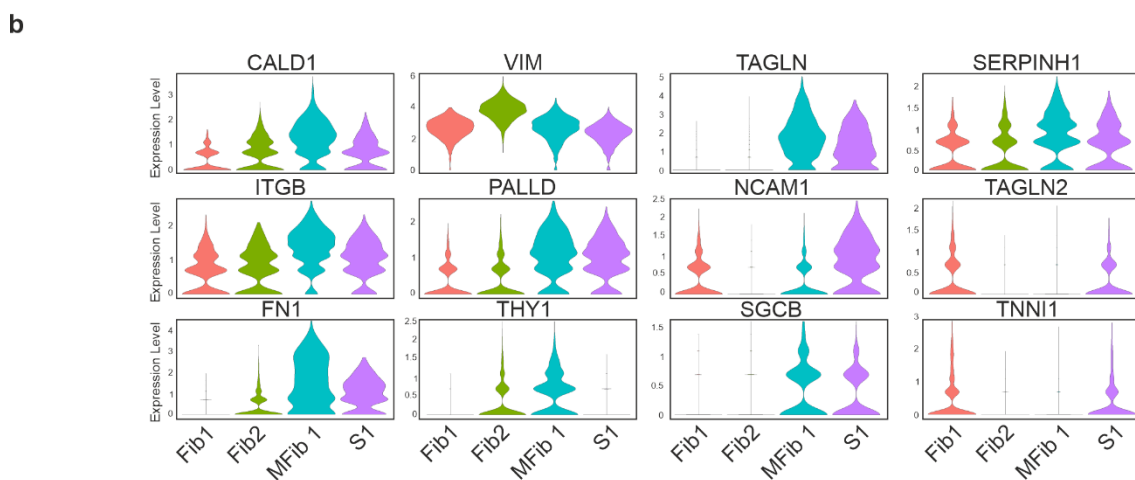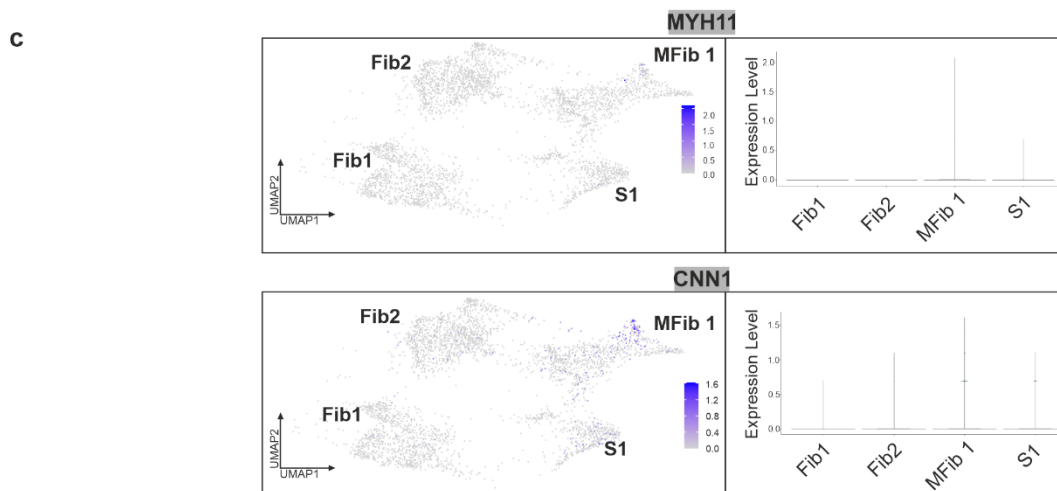



**Supplementary Figure 4. Additional characterisation of stromal populations present within the untreated and TGF $\beta$ 1-treated kidney organoids.**

**a.** Comparison of Fib 1, Fib 2, MFib 1 and S1 with fibroblast, myofibroblast, pericyte and smooth muscle gene expression from previously published scRNAseq data from patients with renal fibrosis<sup>23</sup>. **b.** Violin plots of additional fibroblast and smooth muscle gene expression in Fib 1, Fib 2, MFib 1 and S1. **c.** UMAP plot of gene expression for smooth muscle genes MYH11 and CNN1 and their corresponding violin plots in Fib 1, Fib 2, MFib 1 and S1.

**Supplementary Data 3: Gene ontology analysis (Panther) of top 15 differentially upregulated genes in MFib 1 and S1 in response to TGF $\beta$ 1.**

| Cluster                           | GO Summary for 15 differentially expressed genes                                                                                                                                                                                                                                                                            |
|-----------------------------------|-----------------------------------------------------------------------------------------------------------------------------------------------------------------------------------------------------------------------------------------------------------------------------------------------------------------------------|
| <b>Cluster 2</b><br><b>MFib 1</b> | <i>Collagen fibril organisation (GO:0030199), Protein complex subunit organisation (GO:0071822), Regulation of epithelial to mesenchymal transition (GO:0010717), Extracellular matrix organisation (GO:0030198), Muscle contraction (GO:0006936)</i>                                                                       |
| <b>Cluster 3</b><br><b>S1</b>     | <i>Embryonic organ development (GO:0048568), Regulation of cytoskeletal organisation (GO:0051493), Negative regulation of platelet-derived growth factor receptor-beta signalling pathway (GO:2000587), Regulation of phosphatidylinositol biosynthetic process (GO:0010511), Left/Right pattern formation (GO:0060972)</i> |

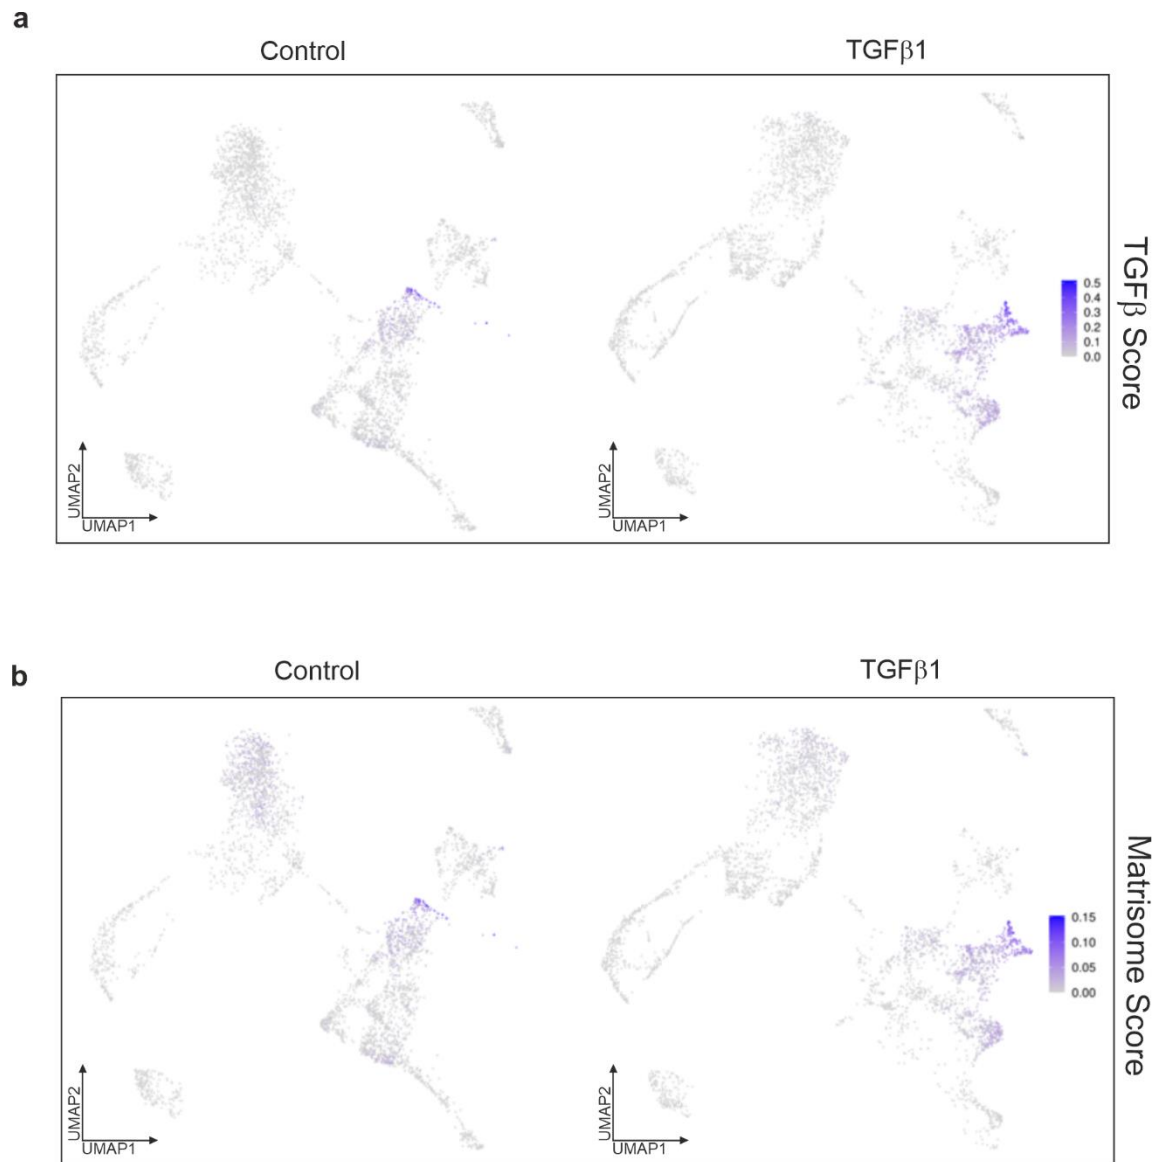

**Supplementary Figure 5: Single cell RNAseq UMAP projections of “matrisome” and “TGFβ-regulated” genes in iPSC-derived kidney organoids treated with TGFβ1.**

**a.** Cells within the control and TGFβ1-treated organoids were scored for TGFβ target genes. An increase in TGFβ associated genes was seen in clusters MFib 1 and S1. **b.** Cells within the control and TGFβ1-treated organoids were scored for core matrisome genes and these genes were also increased in MFib 1 and S1.

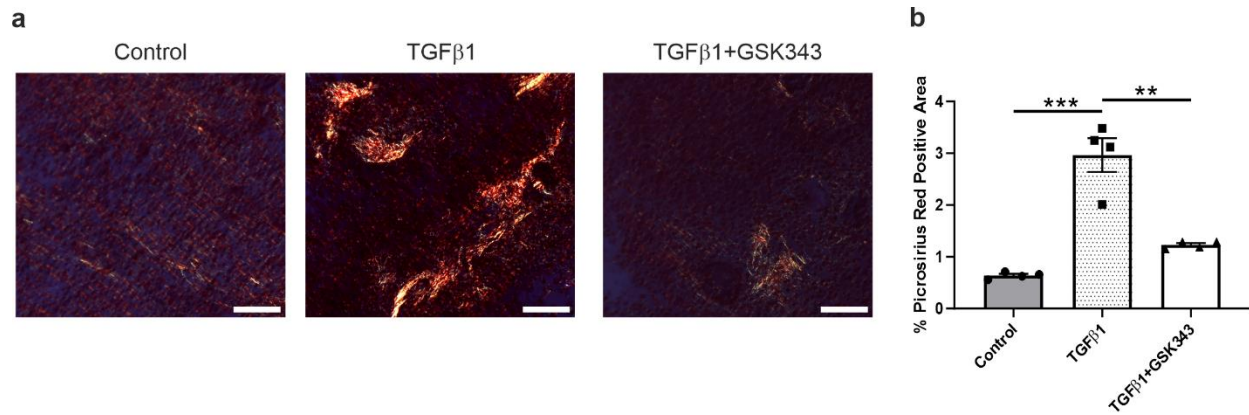

**Supplementary Figure 6. Picrosirius red staining of untreated, TGF $\beta$ 1, and TGF $\beta$ 1+GSK343 treated organoids.**

**a.** Representative collagen staining with Picrosirius red stain in untreated kidney organoids and organoids treated with TGF $\beta$ 1 or TGF $\beta$ 1+GSK343. Scale bar: 100 $\mu$ m. **b.** Percentage of positively stained picrosirius red area. Bar graph shows semi-quantitative analysis for picrosirius red stained sections, taken from one organoid per condition, from four independent experiments. Data are presented as the mean  $\pm$  SEM. \*\* $P < 0.0004$  (Control versus TGF $\beta$ 1), \*\*\* $P < 0.0019$  (TGF $\beta$ 1 versus TGF $\beta$ 1+GSK343).

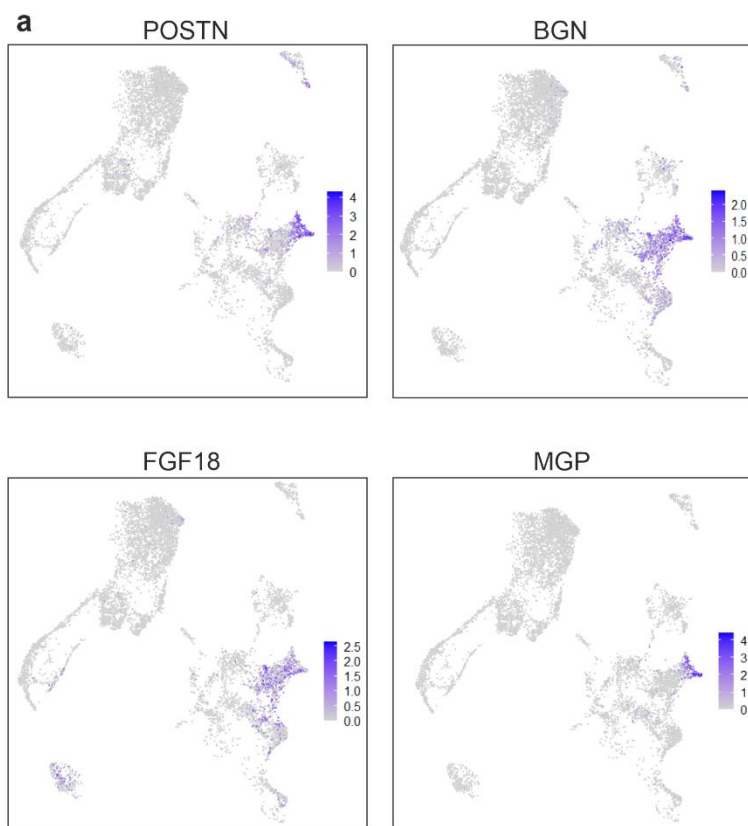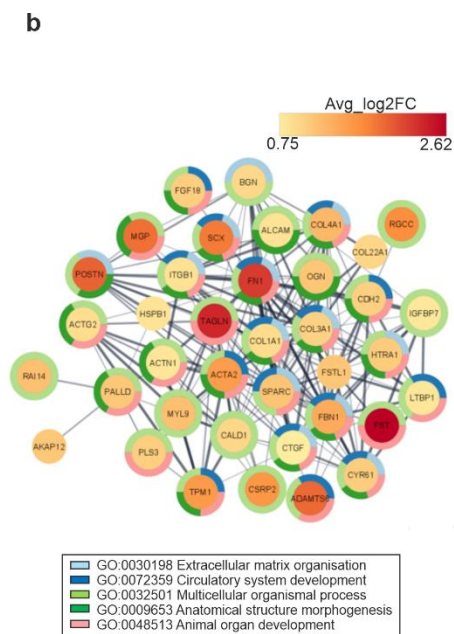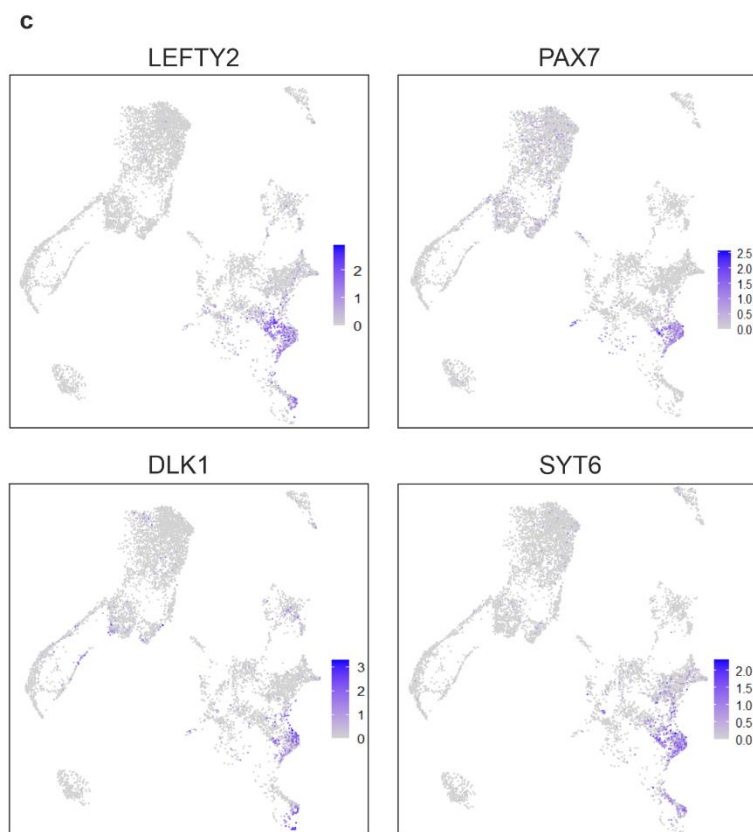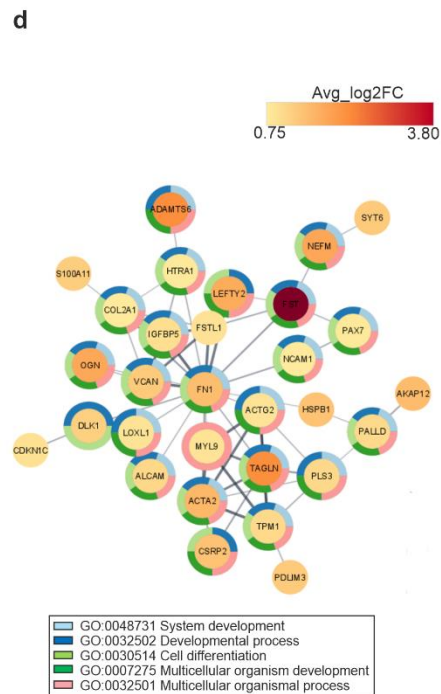

**Supplementary Figure 7. Myofibroblast associated genes are enriched in MFib 1 and S1.**

**a.** UMAP plots of genes that are upregulated in MFib 1 compared to Fib 1, 2 and S1 including the expression of *POSTN*, *BGN*, *FGF18*, and *MGP*. **b.** Protein-protein interactions and gene ontology (biological process) analysis were generated using STRING in Cytoscape for the top 50 differentially upregulated genes in MFib 1. Nodes are coloured based on average log<sub>2</sub> fold change (Avg\_log<sub>2</sub>FC) and line thickness indicates strength of data supporting the interaction. Genes without identified interactions are not shown. The top 5 enriched GO terms for each gene are shown. **c.** UMAP plots of genes that are upregulated in S1 compared to Fib 1,2, and MFib 1 including the expression of *LEFTY2*, *PAX7*, *DLK1*, and *SYT6*. **d.** Protein-protein interactions for the top 50 differentially upregulated genes in S1.

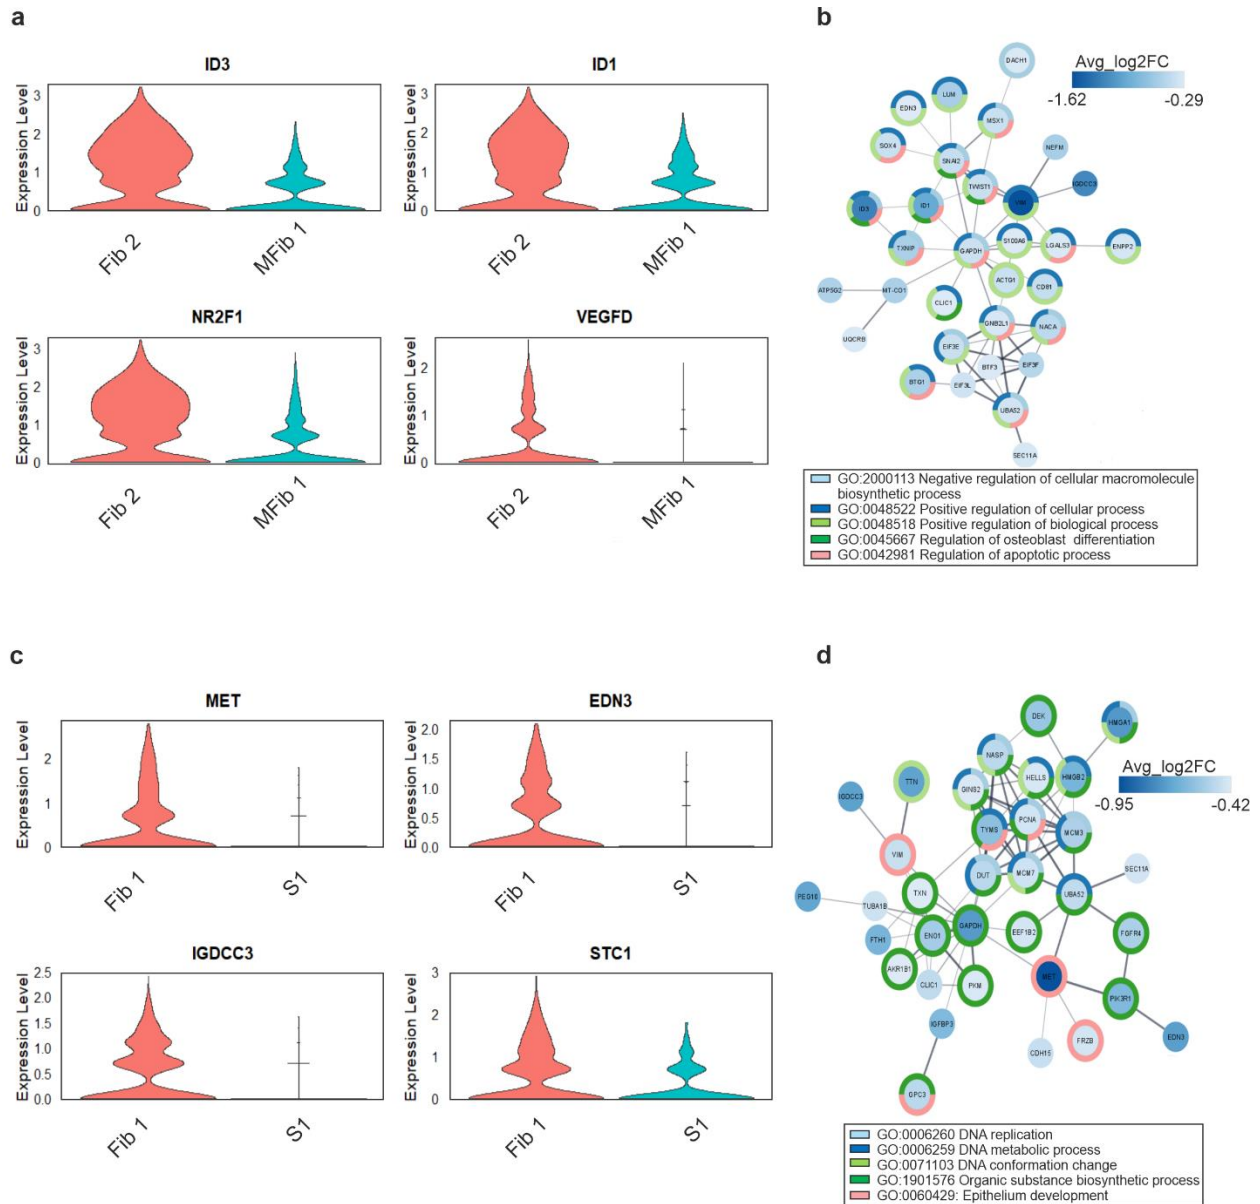

**Supplementary Figure 8. Differentially downregulated genes in MFib 1 and S1 compared to parent populations.**

**a.** Violin plots of differentially downregulated genes in MFib 1 compared to parent cluster Fib 2 including *ID3*, *ID1*, *NR2F1*, and *VEGFD*. **b.** Protein-protein interactions and gene ontology (biological process) analysis were generated using STRING in Cytoscape for the top 50 differentially downregulated genes in S1. Nodes are coloured based on average log<sub>2</sub> fold change (Avg\_log<sub>2</sub>FC) and line thickness indicates strength of data supporting the interaction. Genes without identified interactions are not shown. The top 5 enriched GO terms for each gene are shown. **c.** Violin plots of differentially downregulated genes in S1 compared to parent cluster Fib 2 including *MET*, *EDN3*, *IGDC3*, and *STC1*. **d.** Protein-protein interactions and gene ontology (biological process) analysis for the top 50 differentially downregulated genes in S1.

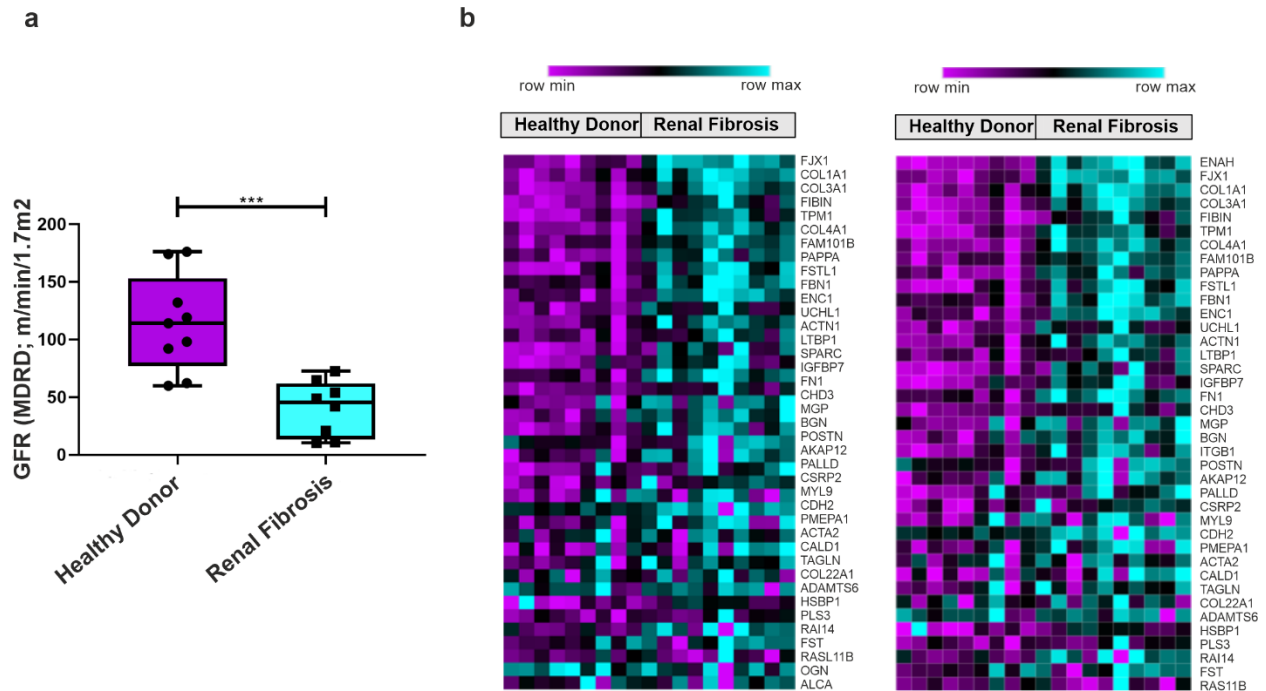

**Supplementary Figure 9: Top upregulated genes in M1Fib and S1 compared to bulk RNAseq from patients with renal fibrosis.**

**A.** Reduced GFR in renal fibrosis is characteristic of loss of renal function. \*\*\* $P < 0.0006$ , unpaired t-test. **B.** DEG genes from M1Fib 1 and Per 1 are like that observed in patients with kidney disease. Data was obtained from healthy donor ( $n=9$ ) and kidney disease samples ( $n=10$ ) from the European Renal cDNA bank Nephrotic Syndrome Tubulointerstitial dataset ([www.nephroseq.org](http://www.nephroseq.org)).



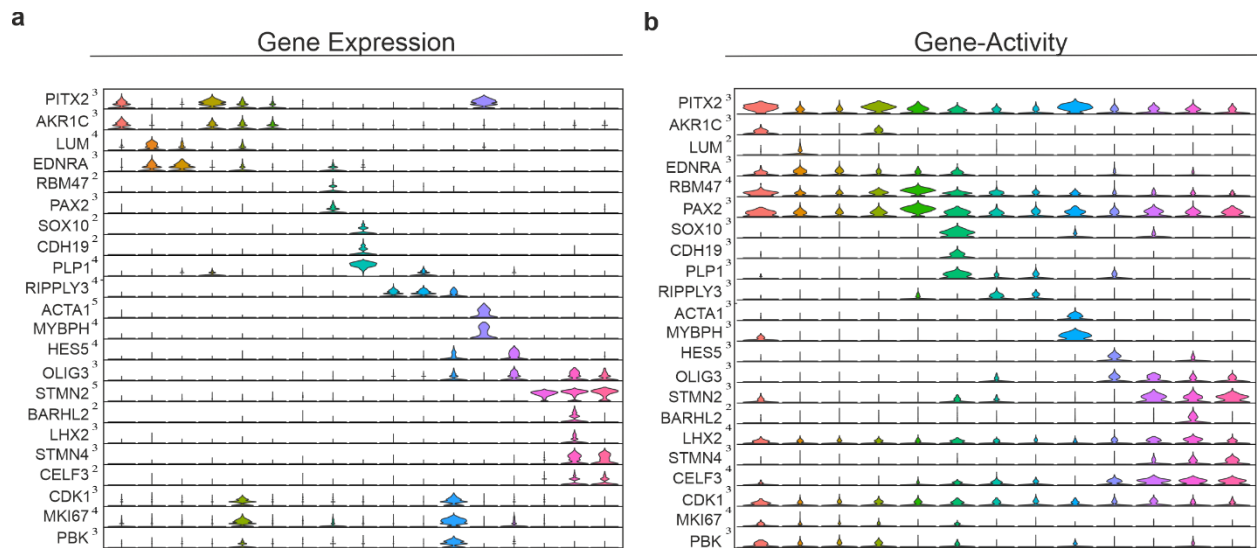

**Supplementary Figure 10. Annotation of scATACseq clusters.**

To interpret cluster annotation in the scATACseq dataset, cross-modality integration was performed, and labels were transferred. DotPlot visualisation of shared gene expression and gene-activity patterns for key marker genes in **a**. scRNAseq and **b**. scATACseq datasets.

**Supplementary Data 5:** Global changes in chromatin accessibility between conditions at Transcription Start Site (TSS), promoters, enhancers, and DNase I hypersensitivity sites as measured by pairwise t-tests using post hoc Bonferroni correction. ns =  $>0.05$ ; \*  $P \leq 0.05$ ; \*\*  $P \leq 0.01$ ; \*\*\*  $P \leq 0.001$ ; \*\*\*\*  $P \leq 0.0001$ .

|                | group1      | group2      | n1   | n2   | statistic | Degrees of freedom | p         | p.adjusted | p.adj.signif |
|----------------|-------------|-------------|------|------|-----------|--------------------|-----------|------------|--------------|
| TSS_score      | Control     | ControlTGFB | 1292 | 827  | -22.0102  | 1877.351           | 1.06E-95  | 6.36E-95   | ****         |
| TSS_score      | Control     | GSK         | 1292 | 1625 | -5.45908  | 2745.484           | 5.21E-08  | 3.13E-07   | ****         |
| TSS_score      | Control     | GSKTGFB     | 1292 | 4788 | -3.20937  | 1837.72            | 0.001     | 0.006      | **           |
| TSS_score      | ControlTGFB | GSK         | 827  | 1625 | 18.17448  | 1775.327           | 7.90E-68  | 4.74E-67   | ****         |
| TSS_score      | ControlTGFB | GSKTGFB     | 827  | 4788 | 24.39793  | 1095.379           | 2.38E-105 | 1.43E-104  | ****         |
| TSS_score      | GSK         | GSKTGFB     | 1625 | 4788 | 3.80593   | 2522.189           | 0.000145  | 0.00087    | ***          |
| TSS_score      | Control     | ControlTGFB | 1292 | 827  | -22.0102  | 1877.351           | 1.06E-95  | 6.36E-95   | ****         |
| promoter_score | Control     | ControlTGFB | 1292 | 827  | -22.4322  | 1906.185           | 4.28E-99  | 2.57E-98   | ****         |
| promoter_score | Control     | GSK         | 1292 | 1625 | -5.09476  | 2744.699           | 3.73E-07  | 2.24E-06   | ****         |
| promoter_score | Control     | GSKTGFB     | 1292 | 4788 | -3.06631  | 1822.224           | 0.002     | 0.012      | **           |
| promoter_score | ControlTGFB | GSK         | 827  | 1625 | 18.92771  | 1812.959           | 4.69E-73  | 2.81E-72   | ****         |
| promoter_score | ControlTGFB | GSKTGFB     | 827  | 4788 | 25.25269  | 1101.523           | 2.23E-111 | 1.34E-110  | ****         |
| promoter_score | GSK         | GSKTGFB     | 1625 | 4788 | 3.490015  | 2498.132           | 0.000491  | 0.002946   | ***          |
| enhancer_score | Control     | ControlTGFB | 1292 | 827  | -2.73648  | 1465.278           | 0.006     | 0.036      | **           |
| enhancer_score | Control     | GSK         | 1292 | 1625 | 9.947646  | 2730.284           | 6.31E-23  | 3.79E-22   | ****         |
| enhancer_score | Control     | GSKTGFB     | 1292 | 4788 | 3.332233  | 1890.256           | 0.000878  | 0.005268   | **           |
| enhancer_score | ControlTGFB | GSK         | 827  | 1625 | 10.12127  | 1330.572           | 3.01E-23  | 1.81E-22   | ****         |
| enhancer_score | ControlTGFB | GSKTGFB     | 827  | 4788 | 5.328039  | 973.9712           | 1.23E-07  | 7.38E-07   | ****         |
| enhancer_score | GSK         | GSKTGFB     | 1625 | 4788 | -9.64138  | 2631.47            | 1.21E-21  | 7.26E-21   | ****         |
| DNase_score    | Control     | ControlTGFB | 1292 | 827  | -24.5392  | 2085.948           | 4.88E-117 | 2.93E-116  | ****         |
| DNase_score    | Control     | GSK         | 1292 | 1625 | -1.89467  | 2705.479           | 0.058     | 0.348      | ns           |
| DNase_score    | Control     | GSKTGFB     | 1292 | 4788 | -2.17128  | 1751.957           | 0.03      | 0.18       | ns           |
| DNase_score    | ControlTGFB | GSK         | 827  | 1625 | 24.66932  | 2096.33            | 3.47E-118 | 2.08E-117  | ****         |
| DNase_score    | ControlTGFB | GSKTGFB     | 827  | 4788 | 30.9395   | 1195.165           | 7.20E-155 | 4.32E-154  | ****         |
| DNase_score    | GSK         | GSKTGFB     | 1625 | 4788 | 0.145638  | 2431.567           | 0.884     | 1          | ns           |

**Supplementary Data 6:** Changes in chromatin accessibility between Fib 2 and MFib 1 at Transcription Start Site (TSS), promoters, enhancers, and DNase I hypersensitivity sites as measured by pairwise t-tests using post hoc Bonferroni correction. ns =  $>0.05$ ; \*  $P \leq 0.05$ ; \*\*  $P \leq 0.01$ ; \*\*\*  $P \leq 0.001$ ; \*\*\*\*  $P \leq 0.0001$ .

|                | group1             | group2             | n1  | n2   | statistic    | Degrees of freedom | p        | p.adjusted | p.adj.signif |
|----------------|--------------------|--------------------|-----|------|--------------|--------------------|----------|------------|--------------|
| TSS_score      | Fib 2_Control      | MFib 1_ControlTGFB | 231 | 214  | -12.41943811 | 442.731142         | 1.36E-30 | 2.72E-30   | ****         |
| TSS_score      | MFib 1_ControlTGFB | MFib 1_GSKTGFB     | 214 | 1839 | 13.75785879  | 248.5231876        | 2.12E-32 | 4.24E-32   | ****         |
| promoter_score | Fib 2_Control      | MFib 1_ControlTGFB | 231 | 214  | -12.74800175 | 441.6966474        | 6.49E-32 | 1.30E-31   | ****         |
| promoter_score | MFib 1_ControlTGFB | MFib 1_GSKTGFB     | 214 | 1839 | 14.35913935  | 249.7537118        | 1.70E-34 | 3.40E-34   | ****         |
| enhancer_score | Fib 2_Control      | MFib 1_ControlTGFB | 231 | 214  | 3.716611109  | 431.169688         | 0.000229 | 0.000458   | ***          |
| enhancer_score | MFib 1_ControlTGFB | MFib 1_GSKTGFB     | 214 | 1839 | -2.730299054 | 246.8121449        | 0.007    | 0.014      | **           |
| DNase_score    | Fib 2_Control      | MFib 1_ControlTGFB | 231 | 214  | -11.24945356 | 415.9995536        | 8.18E-26 | 1.64E-25   | ****         |
| DNase_score    | MFib 1_ControlTGFB | MFib 1_GSKTGFB     | 214 | 1839 | 14.71322606  | 267.898061         | 2.55E-36 | 5.10E-36   | ****         |

a

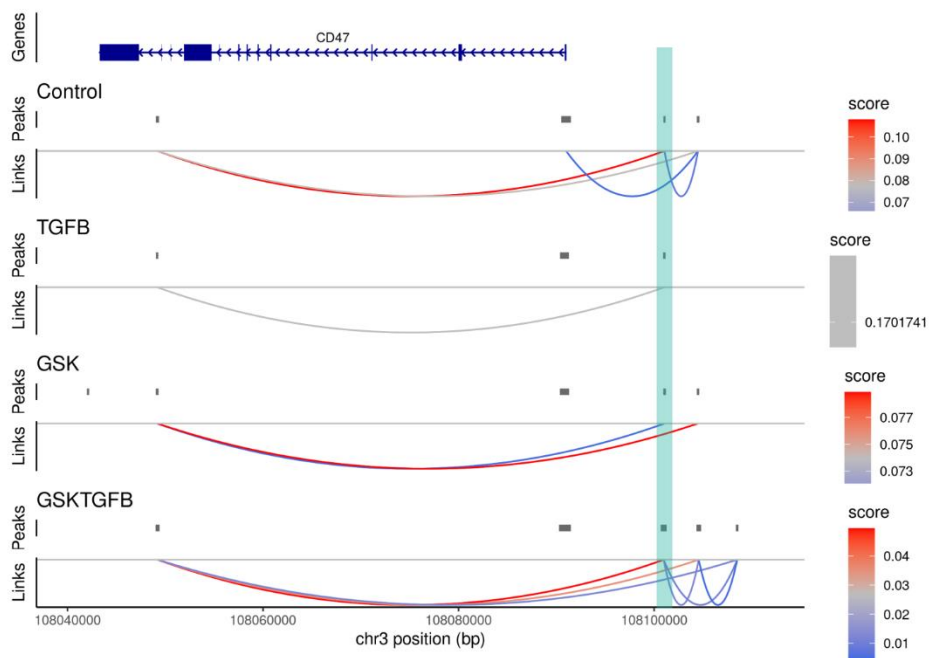

b

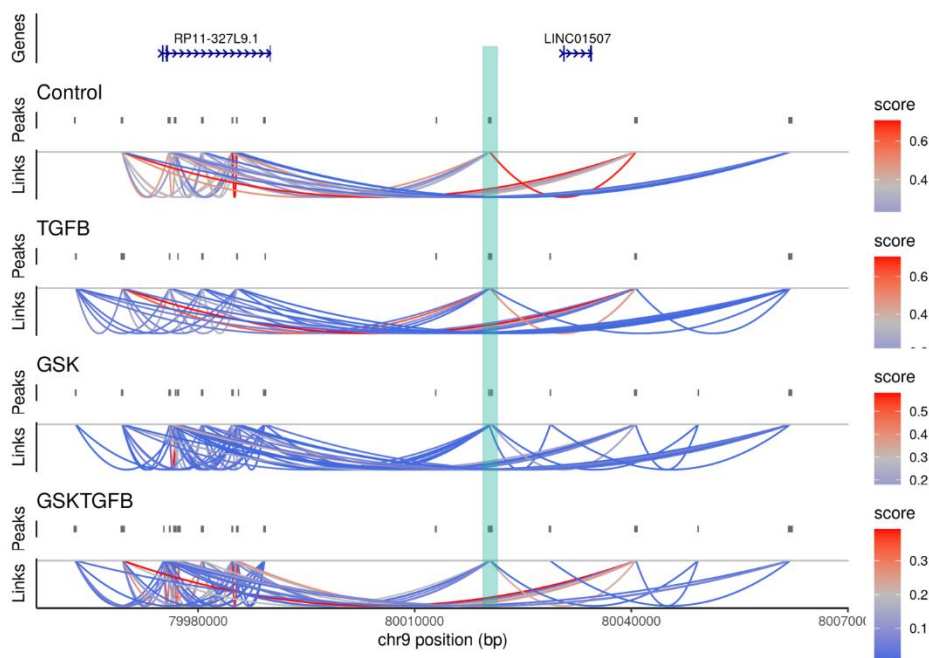

**Supplementary Figure 11. Changes in cis co-accessibility observed in control, TGF $\beta$ 1, and GSK343+TGF $\beta$ 1 treated organoids at a putative enhancer region identified to be co-occupied by SMAD3 and EZH2 in human iPSCs and Day 7 cells.**

TGF $\beta$ 1 changes cis co-accessibility at a putative enhancer region in **a.** iPSCs (chr3:108090401-108091801) and **b.** Day 7 cells (chr9:80012751-80015001) compared to control or GSK343 pre-treated organoids. Cis co-accessibility links obtained from Cicero illustrate the probability of increased (red) or decreased (blue) connections between promoter and enhancer regions. Enhancer region is indicated in green.

**Supplementary Data 8:** Top 25 differential regulons identified in MFib 1 compared to its parent population Fib 2. Sorted on average log fold change (Avg\_logFC). P\_val: p-value; P\_val\_adj: adjusted p-value after Bonferroni correction (false discovery rate detection); Pct: percentage of cells where gene is detected in the group.

| Regulon           | p_val     | avg_log2FC | MFib 1 | Fib 2 | p_val_adj |
|-------------------|-----------|------------|--------|-------|-----------|
| NUAK1-(+)-motif   | 7.82E-272 | 0.359355   | 0.996  | 0.93  | 2.07E-269 |
| HES1-(+)-motif    | 1.25E-196 | 0.186447   | 0.958  | 0.672 | 3.33E-194 |
| FOSL2-(+)-motif   | 4.79E-270 | 0.153037   | 1      | 0.989 | 1.27E-267 |
| JUNB-(+)-motif    | 5.13E-162 | 0.092462   | 0.999  | 0.98  | 1.36E-159 |
| BHLHE40-(+)-motif | 1.41E-159 | 0.092391   | 0.888  | 0.479 | 3.73E-157 |
| ELK3-(+)-motif    | 9.75E-298 | 0.090374   | 1      | 1     | 2.58E-295 |
| GATA6-(+)-motif   | 5.41E-60  | 0.083474   | 0.947  | 0.83  | 1.43E-57  |
| FOXL2-(+)-motif   | 6.84E-168 | 0.082467   | 0.991  | 0.85  | 1.81E-165 |
| RARG-(+)-motif    | 6.55E-76  | 0.077709   | 0.773  | 0.435 | 1.74E-73  |
| ETV3-(+)-motif    | 3.11E-73  | 0.074807   | 0.957  | 0.821 | 8.25E-71  |
| CREB3L1-(+)-motif | 6.58E-128 | 0.06672    | 1      | 1     | 1.74E-125 |
| ERG-(+)-motif     | 4.19E-182 | 0.063093   | 1      | 0.996 | 1.11E-179 |
| FOS-(+)-motif     | 1.26E-182 | 0.061631   | 1      | 0.934 | 3.33E-180 |
| HOXA7-(+)-motif   | 2.97E-98  | 0.059534   | 1      | 1     | 7.88E-96  |
| FLI1-(+)-motif    | 2.62E-175 | 0.058898   | 1      | 1     | 6.93E-173 |
| KLF10-(+)-motif   | 8.22E-154 | 0.057612   | 1      | 0.989 | 2.18E-151 |
| KLF2-(+)-motif    | 5.82E-173 | 0.057418   | 1      | 1     | 1.54E-170 |
| XBP1-(+)-motif    | 2.89E-183 | 0.044966   | 1      | 1     | 7.65E-181 |
| HOXA13-(+)-motif  | 7.68E-42  | 0.03963    | 0.496  | 0.247 | 2.04E-39  |
| HIC1-(+)-motif    | 3.84E-49  | 0.037685   | 1      | 1     | 1.02E-46  |
| NFIC-(+)-motif    | 1.39E-33  | 0.033138   | 0.702  | 0.514 | 3.67E-31  |
| CREB3-(+)-motif   | 7.27E-64  | 0.032332   | 0.929  | 0.817 | 1.93E-61  |
| JUN-(+)-motif     | 3.45E-200 | 0.031444   | 1      | 1     | 9.13E-198 |
| NFIB-(+)-motif    | 1.64E-94  | 0.031232   | 1      | 1     | 4.36E-92  |
| JUND-(+)-motif    | 4.99E-148 | 0.03026    | 1      | 1     | 1.32E-145 |

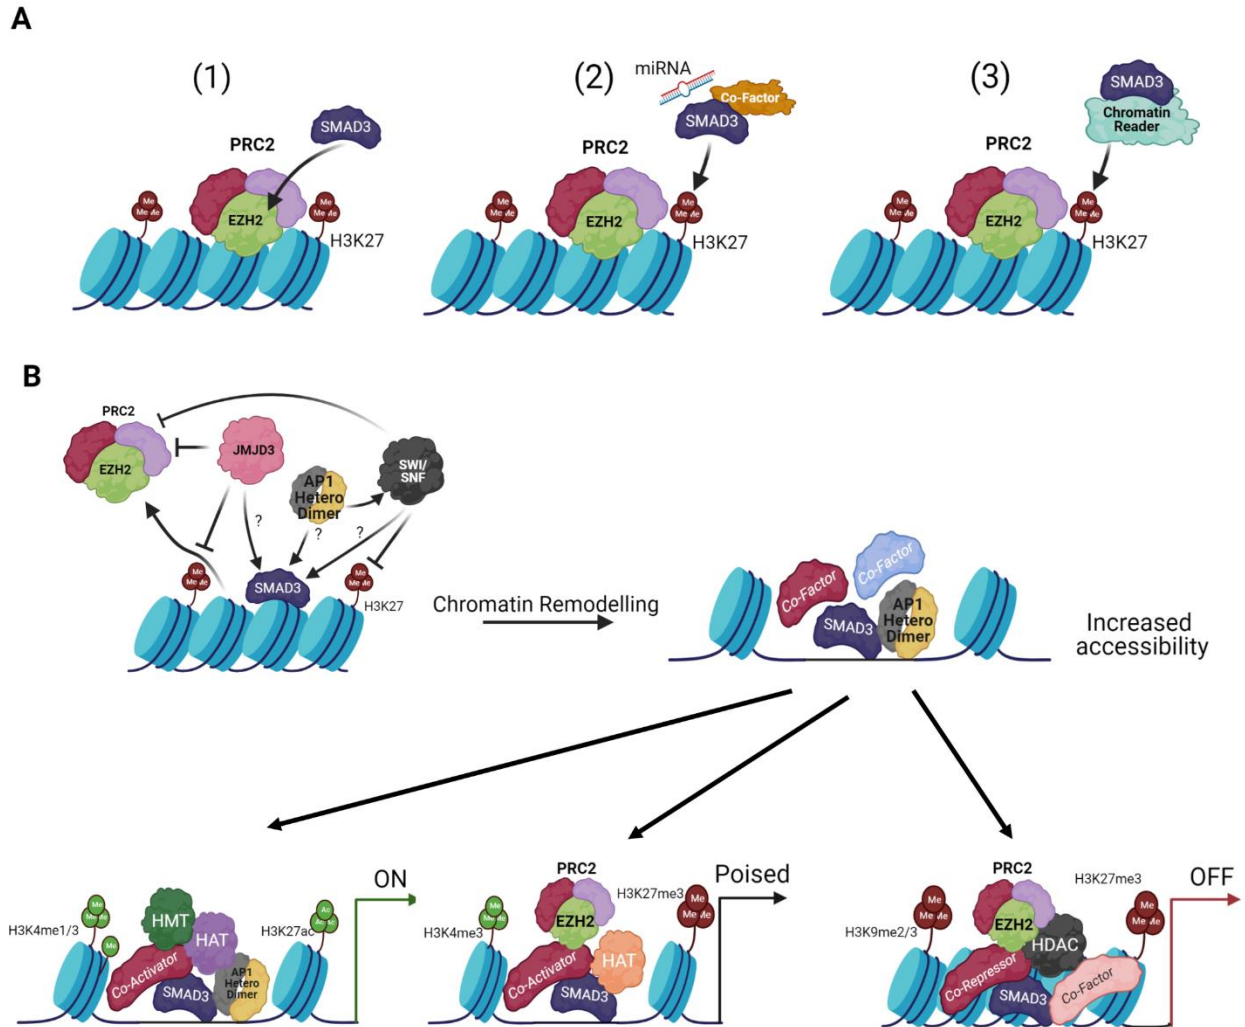

### Supplementary Figure 12. SMAD3 and EZH2 cooperate to regulate chromatin accessibility

**a.** Schematic of TGF $\beta$ -induced increased chromatin accessibility. (1) SMAD3 directly interacts with EZH2, (2) SMAD3 indirectly interacts with EZH2, or (3) SMAD3 cooperates with a chromatin reader to identify and recognise the H3K27me3 mark. **b.** Schematic showing that SMAD3 may facilitate open chromatin states by displacing the polycomb repressive complex and recruiting chromatin remodellers such as SWI/SNF and/or HDACs such as JMJD3. Interaction with AP-1 and other co-factors during chromatin remodelling may facilitate increased accessibility. To enable the activation of target gene expression, SMAD3 may recruit co-activators, histone methyltransferases, and histone acetyltransferases to catalyse the H3K4me1/3 and H3K27ac marks at enhancer regions. The recruitment of PRC2 may permit the acquisition of poised states. Finally, the recruitment of co-repressors, histone deacetylases, and the PRC2 complex may allow for the silencing of TGF $\beta$ 1 target genes and the acquisition of the H3K9me2/3 and H3K27me3 histone marks. Created using Biorender.

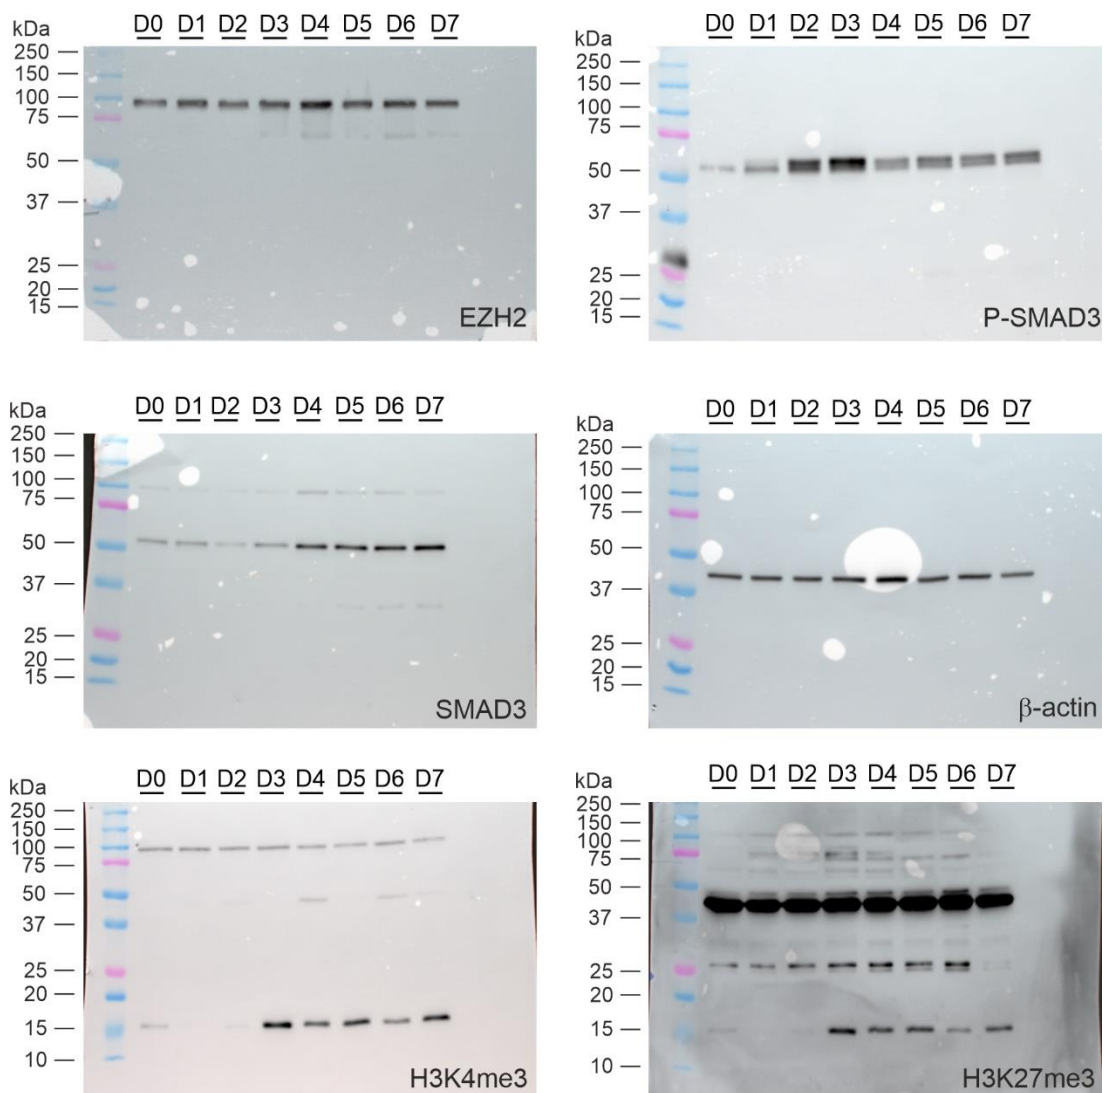

**Supplementary Figure 13: Uncropped western blots used in Figure 1C.**

Western blot analysis of EZH2, Phosphorylated SMAD3 (P-SMAD3), total SMAD3,  $\beta$ -actin, H3K4me3, and H3K27me3 expression in whole cell lysate from iPSCs over the course of nephrogenic specification.
