# Supplementary material for: Single-cell multiomics reveals the complexity of TGFβ signalling to chromatin in iPSC-derived kidney organoids
Source: PubMed Central journal article supplement (PMC9701233; doi:10.1038/s42003-022-04264-1), 2022-11-27
Supplement: 42003_2022_4264_MOESM2_ESM.pdf [file 42003_2022_4264_MOESM2_ESM.pdf]

## Description of Additional Supplementary Files

**File name:** Supplementary Data 1

**Description:** Marker genes used for single cell cluster annotation

**File name:** Supplementary Data 4

**Description:** Differential expression of de novo clusters Myofibroblast 1 (Cluster 2) and Stroma 1 (Cluster 3), identified in iPSC-derived kidney organoids treated with TGF $\beta$ 1

**File name:** Supplementary Data 7

**Description:** Differentially accessible regions and motif enrichment in fibroblast 2 and myofibroblast 1 clusters

**File name:** Supplementary Data 9

**Description:** Source data for ChIPseq graphs (Supplementary Fig. 1A and 1B), and statistical analysis of immunofluorescence and histological images (Fig. 3e-f, 4e-f and Supplementary Fig. 8b)
